# Supplementary material
Source: publisher figshare collection journal article supplement (https://tandf.figshare.com/ndownloader/files/22514705)
Supplement: Supplementary file 1 [file 22514705]

Table S1 Primer sequences for real-time PCR

AMTN forward, 5’-GTTGAATGTACAACAGCAACTGCAC-3’

AMTN reverse, 5'-TTCCATCCTGGACATCTGGATTAG-3'

GAPDH forward, 5'-GCACCGTCAAGGCTGAGAAC-3'

GAPDH reverse, 5'-ATGGTGGTGAAGACGCCAGT-3'
